# Supplementary material
Source: PubMed Central journal article supplement (PMC3762369)
Supplement: mmc1.pdf [file mmc1.pdf]

# **A Novel Implicit Solvent Model for Simulating the Molecular Dynamics of RNA**

Yufeng Liu,<sup>†</sup> Esmael Haddadian,<sup>‡</sup> Tobin R. Sosnick,<sup>§</sup> Karl F. Freed,<sup>¶\*</sup> and  
Haipeng Gong<sup>†\*</sup>

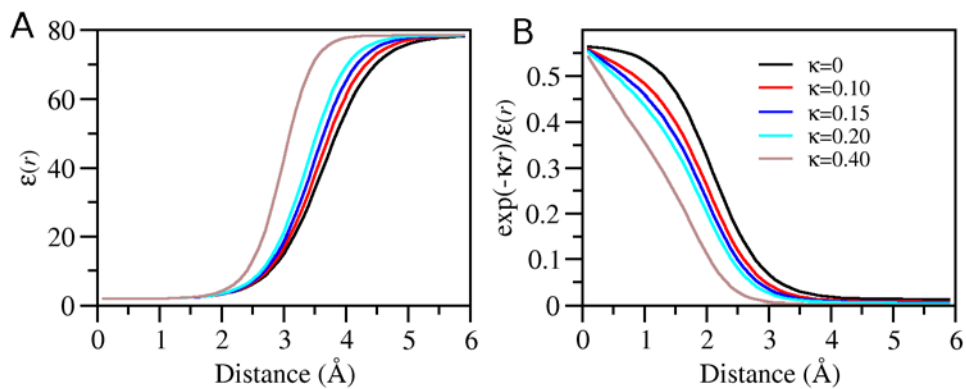

**Figure S1.** The influence of Debye-Hückle screening constant  $\kappa$  on the distance-dependent electrostatic screenings in our model. The dielectric function  $\epsilon(r)$  and the overall screening term in electrostatic calculation (Eq. 13),  $\exp(-\kappa r)/\epsilon(r)$ , are plotted in the panel (A) and (B), respectively, for various  $\kappa$  values.  $\kappa = 0$  (black), 0.1 (red), 0.15 (blue), 0.2 (cyan), and 0.4 (tan) correspond to the monovalent salt of 0, 0.1, 0.225, 0.4, and 1.6 M respectively.

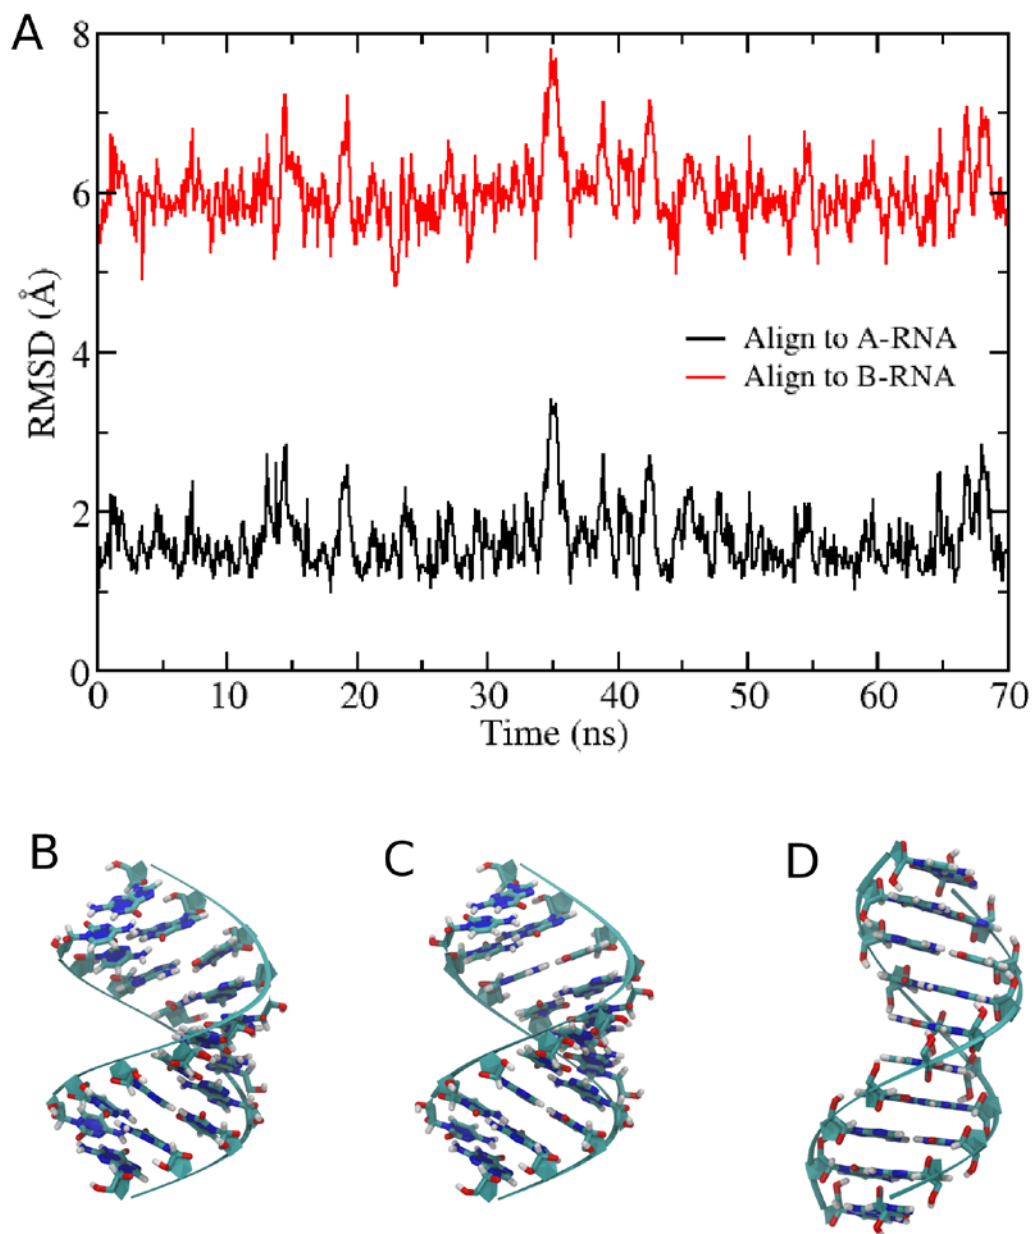

**Figure S2.** The RNA duplex retains the A-form conformation in the implicit solvent simulation. (A) The trajectory RMSDs of the simulated molecules when aligned to the canonical A-form (black) and B-form (red) conformations respectively. (B-D) The structural snapshot taken from the implicit solvent simulation (B) shows higher degree of structural similarity to the canonical A-form RNA duplex (C) than to the canonical B-form RNA duplex (D).

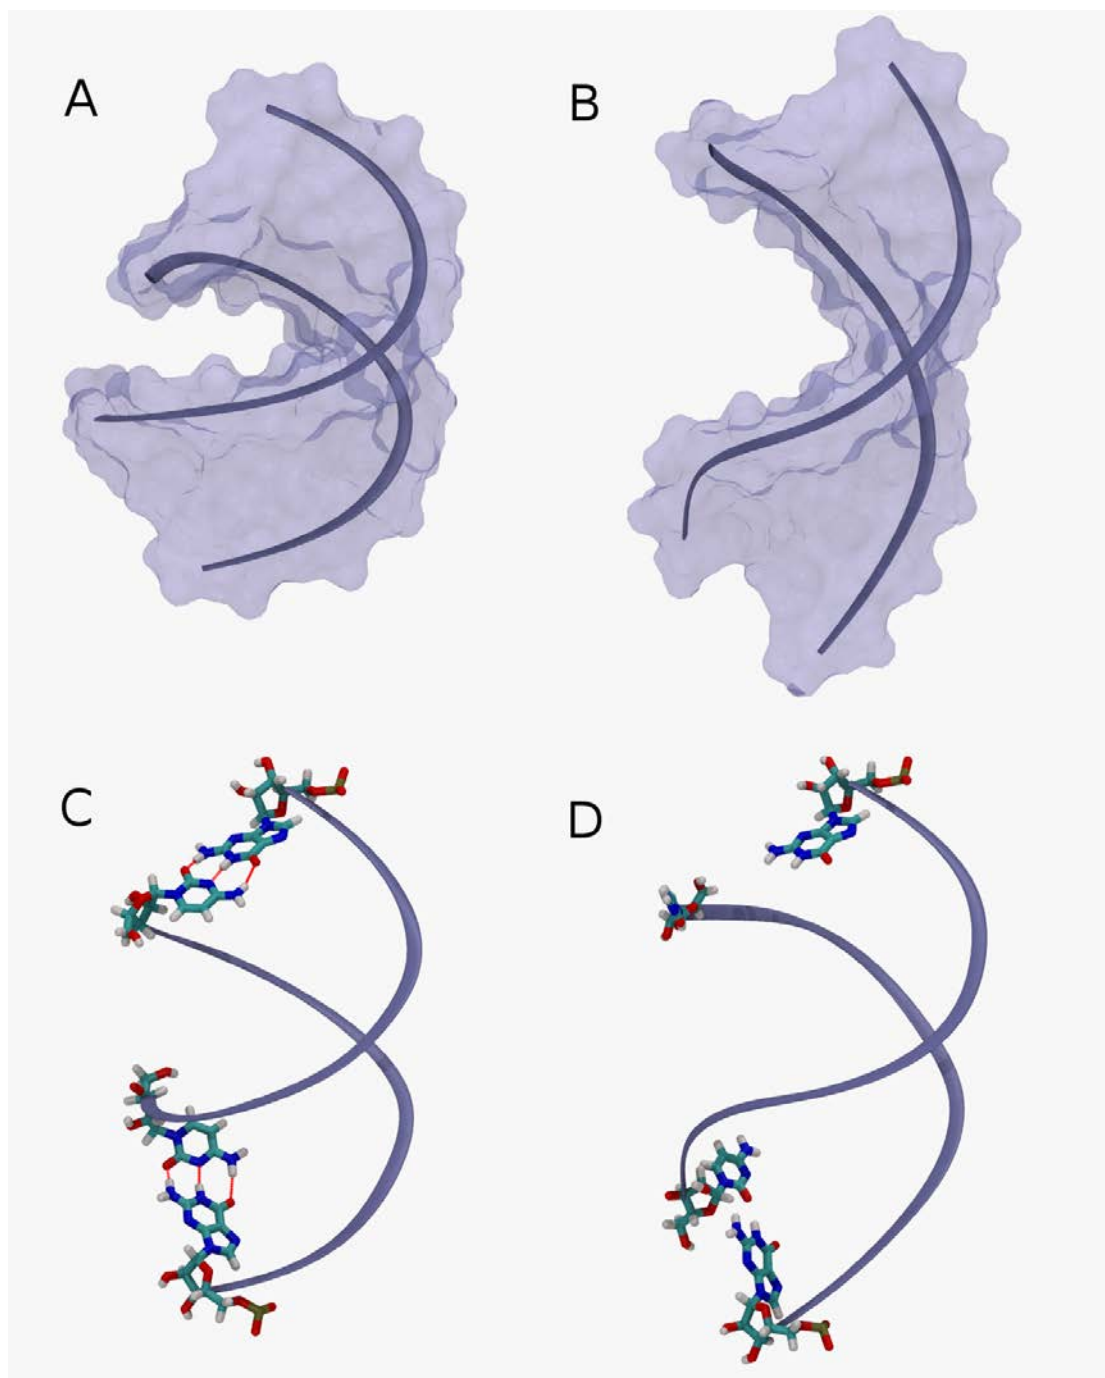

**Figure S3.** Duplex bending and the disruption of terminal G-C base pairs in the explicit solvent simulation of the A-form RNA duplex. Both bent (**A**) and straight (**B**) helical conformations are observed in the trajectory for frames 247 and 370, respectively, in the explicit solvent simulation. The terminal G-C pairs are preserved (**C**) in the early stage (frame 0) but become broken (**D**) at late stages (frame 460) in the explicit solvent simulation. All unrelated atoms are neglected to emphasize the terminal nucleotides.

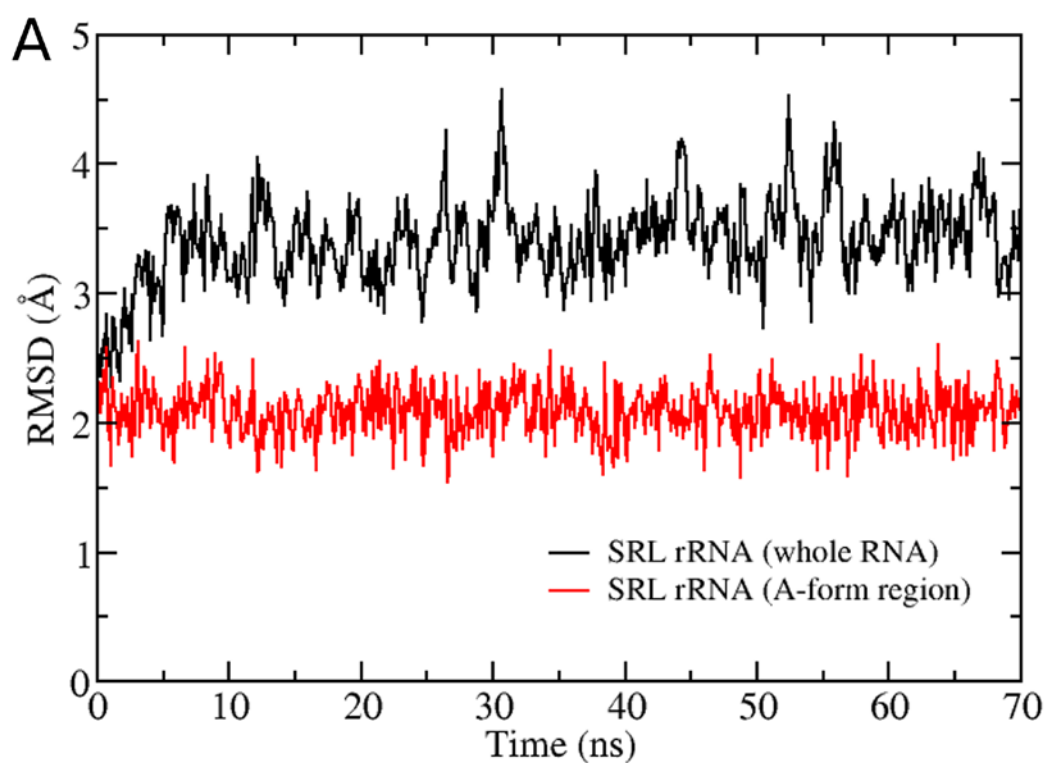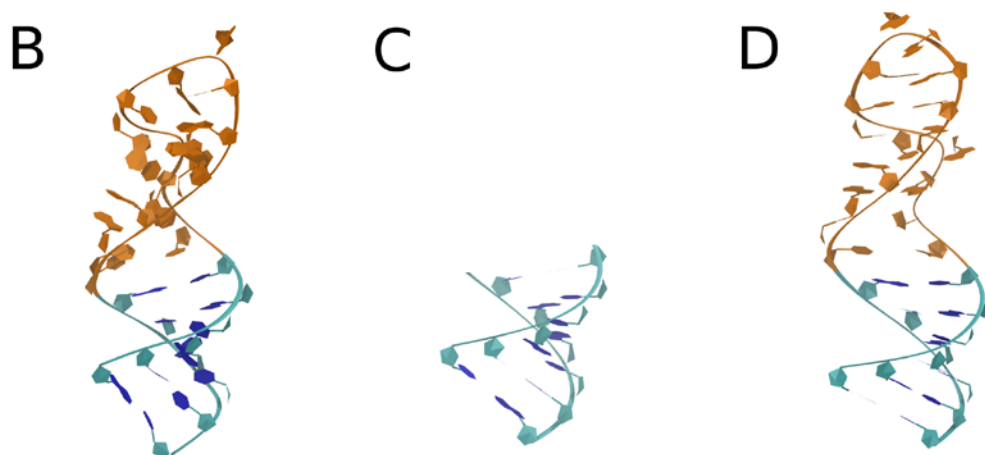

**Figure S4.** The Watson-Crick region of the SRL rRNA retains the A-form helical conformation in the implicit solvent simulation. **(A)** The trajectory RMSD of the Watson-Crick region (red) is greatly lower than that of the overall RNA molecule (black). **(B-D)** The structural snapshot taken from the implicit solvent simulation **(B)** contains a stable Watson-Crick region (cyan), which is structurally similar to both the canonical A-form RNA duplex **(C)** and the corresponding region in the crystal structure of the SRL rRNA **(D)**.

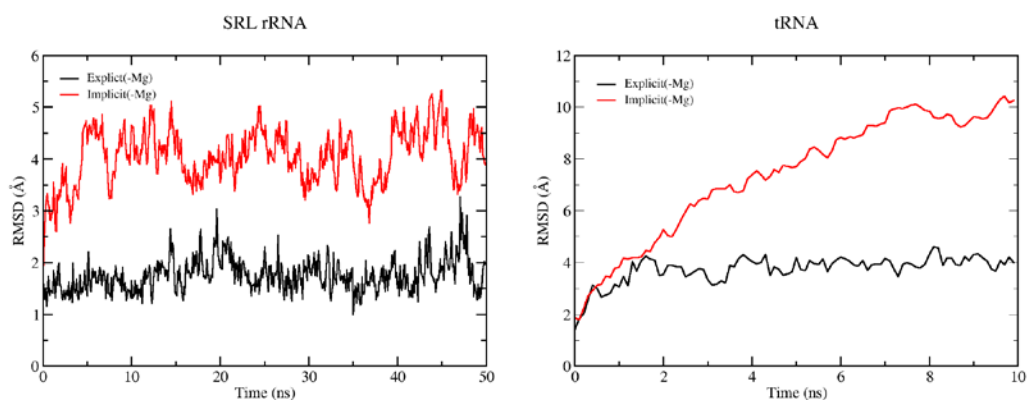

**Figure S5.** RMSD time series for the explicit (black) and implicit (red) simulations without explicit  $Mg^{2+}$  ions. Both SRL rRNA (left) and tRNA (right) simulations for implicit systems yield RMSDs remarkably larger than for explicit ones, which indicates the necessity to include  $Mg^{2+}$  in our implicit solvent model.

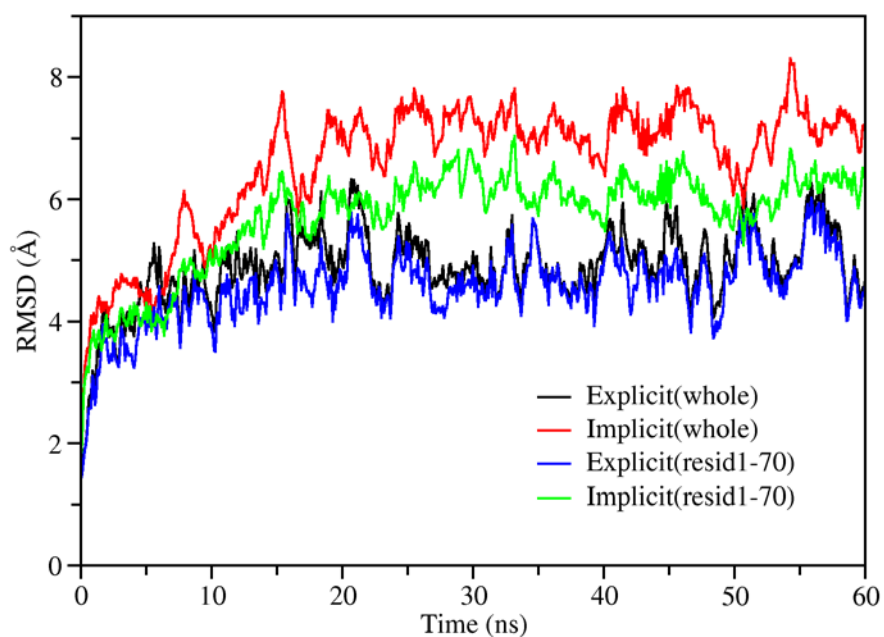

**Figure S6.** RMSD time series for tRNA with or without the five unpaired nucleotides located at the 3'-end. As labeled in the figure, the RMSD of entire molecule in implicit solvent (red) significantly decreases by  $\sim 1$  Å when disregarding the residues at the 3'-end (green). On the contrary, explicit solvent simulations display little reduction of the RMSD if the unpaired terminal residues of the 3'-end are neglected (blue vs. black).

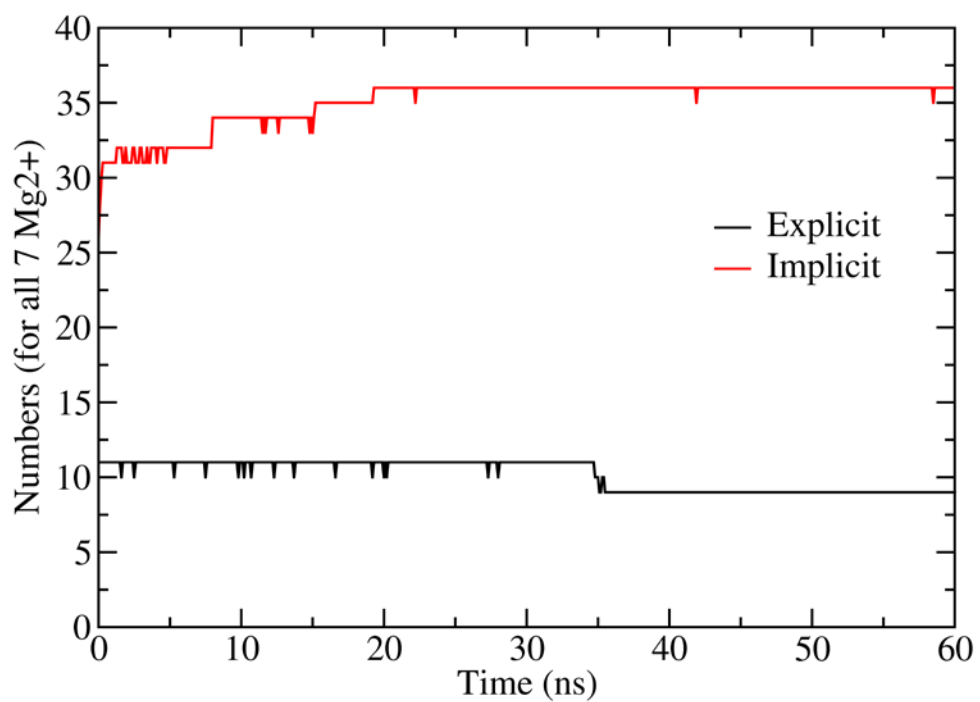

**Figure S7.** The overall coordination numbers around the seven Mg<sup>2+</sup> in the simulation of tRNA using implicit (red) and explicit (black) solvent.



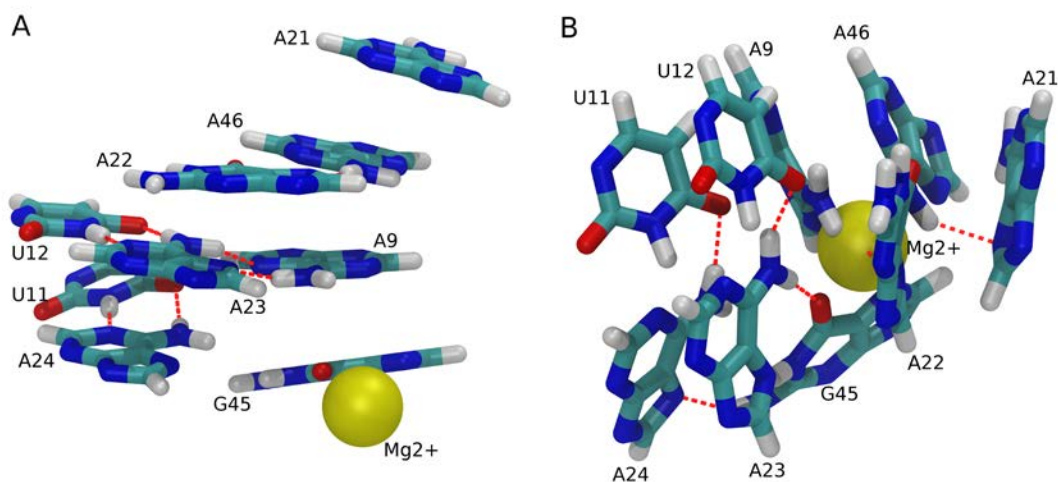

**Figure S8.** Structural disruption by  $\text{Mg}^{2+}$  in the implicit solvent simulation. Nine nucleotides (nucleotides A9, U11, U12, A21, A22, A23, A24, G45 and A46) as well as a nearby  $\text{Mg}^{2+}$  ion (residue index 79) are displayed here. **(A)** In the crystal structure, the  $\text{Mg}^{2+}$  stays besides the nucleotides and does not perturb the two base triplets (A9-A23-U12 and A9-U11-A24) which are stabilized by 7 hydrogen bonds (red dashed lines). **(B)** After 50 ns simulation, the ion is squeezed into the nucleotide core and thus breaks the previous triplets, leading to the reformation of two weakly interacting triplets (U12-A23-G45 and U11-A24-G45) with only 4 connecting hydrogen bonds. Thus, the overall orientation changes greatly (both A and B are taken from structurally aligned tRNA conformations). Additionally, the A9-G45 stacking is disrupted, leaving G45 unpacked, and A21 and G22 are also not well packed after simulation.

**Table S1.** Weight  $g_i$  of each atom type  $i$  for evaluating the solvation energy with the SASA model. Weights are obtained from fits to solvation energies.

| Atom | $g_i$     | Atom | $g_i$      |
|------|-----------|------|------------|
| C    | 0.001624  | O2   | -0.033022* |
| CA   | -0.014606 | O2-  | -1.402429* |
| CT   | -0.005197 | OA   | -0.075714  |
| N    | -0.093329 | OH   | -0.078084  |
| N2   | -0.065938 | OS   | -0.084605  |
| NC   | -0.085392 | P    | 0.007208   |
| O    | -0.069924 |      |            |

The atom-type denotations are as follows:

C: carbonyl carbon

CA: conjugated carbon in the base

CT: sp<sup>3</sup> hybridized carbon

N: glycosyl nitrogen

N2: NH<sub>2</sub>

NC: conjugated nitrogen in the base

O: carbonyl oxygen

O2: double bonded oxygen in carboxylate or phosphate

O2-: negatively charged oxygen in the carboxylate or phosphate

OA: carbonyl oxygen in the base

OH: hydroxyl oxygen

OS: ether oxygen

P: phosphus.

\*Since O2 and O2- are chemically identical, their  $g_i$  values are set to be the average of the fitted data, which gives  $g_i$  of -0.7177255.

**Table S2.** Comparison of our model with various GB models for simulations of tRNA.

| System                    | RMSD in the last 1ns ( $\text{\AA}$ ) |                          |
|---------------------------|---------------------------------------|--------------------------|
|                           | With $\text{Mg}^{2+}$                 | Without $\text{Mg}^{2+}$ |
| Our model                 | $5.13 \pm 0.16$                       | $9.94 \pm 0.32$          |
| $\text{GB}_{\text{HCT}}$  | $14.76 \pm 0.75$                      | $15.92 \pm 0.39$         |
| $\text{GB}_{\text{OBC1}}$ | $20.87 \pm 0.92$                      | $19.61 \pm 0.76$         |
| $\text{GB}_{\text{OBC2}}$ | $14.51 \pm 0.74$                      | $17.17 \pm 0.58$         |

RMSDs are calculated with respect to the crystal structure of tRNA for structural snapshots in the last 1 ns of the 10 ns trajectories with and without  $\text{Mg}^{2+}$  ions.

**Table S3.** The model compounds and their experimental solvation energies used in our model to derive the best estimates of  $g_i$  values for various atom types in RNAs.

| <b>Model compound</b> | <b>Solvation energy (kcal/mol)</b> |
|-----------------------|------------------------------------|
| trimethylphosphate    | -8.70                              |
| triethylphosphate     | -7.80                              |
| tripropylphosphate    | -6.10                              |
| dihydrogenphosphate   | -68.00                             |
| phosphine             | 0.60                               |
| pyridine              | -4.70                              |
| 4-methylpyridine      | -4.94                              |
| 4-ethylpyridine       | -4.74                              |
| 2-methylpyrazine      | -5.57                              |
| 2-ethylpyrazine       | -5.51                              |
| aniline               | -5.49                              |
| 4-methylaniline       | -5.55                              |
| 3-aminoaniline        | -9.92                              |
| benzene               | -0.87                              |
| 1-methylthymine       | -10.40                             |
| 9-methyladenine       | -13.60                             |
| methanol              | -5.11                              |
| ethanol               | -5.01                              |
| cyclopentanol         | -5.49                              |
| dimethylether         | -1.92                              |
| diethylether          | -1.76                              |
| tetrahydrofuran       | -3.47                              |
| tetrahydropyran       | -3.12                              |
| 2-methoxyethanol      | -6.77                              |
| acetamide             | -9.71                              |
| N-methylacetamide     | -10.00                             |
| benzamide             | -10.90                             |
| urea                  | -13.80                             |
| 1,4-dioxane           | -5.05                              |
| acetone               | -3.85                              |
| 2-butanone            | -3.64                              |
| ethanal               | -3.50                              |
| propanal              | -3.44                              |
| formic                | -78.00                             |
| acetate               | -80.00                             |
| aceticacid            | -6.70                              |
| propionate            | -78.00                             |
| propionicacid         | -6.47                              |
| benzoicacid           | -7.90                              |
| benzoate              | -73.00                             |
| methane               | 2.00                               |

---

|              |      |
|--------------|------|
| ethane       | 1.83 |
| cyclopentane | 1.20 |

---
